# Supplementary material
Source: Springer Nature journal article supplement (https://www.springermedizin.de/resource/supplementary/13075_2012_3624_MOESM5_ESM.pdf/9694912)

a. Proposals of threshold according to different techniques and different times of evaluation

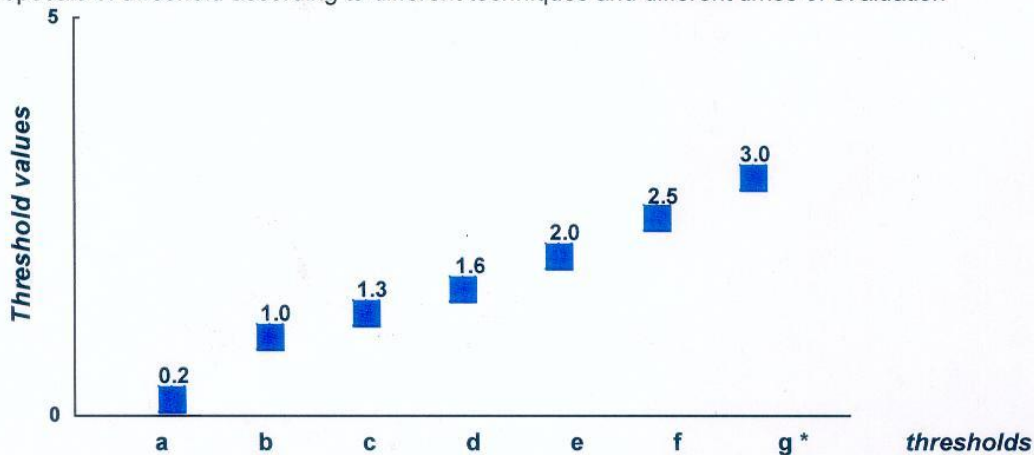

b. Evaluation of the external validity (*versus* DAS28-ESR) of different proposed thresholds

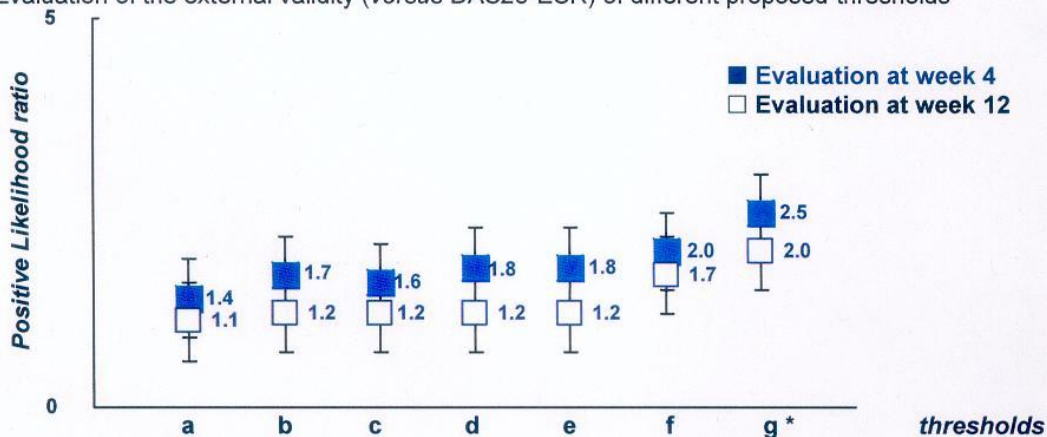

c. Evaluation of external validity (*versus* patient's global assessment) of different proposed thresholds.

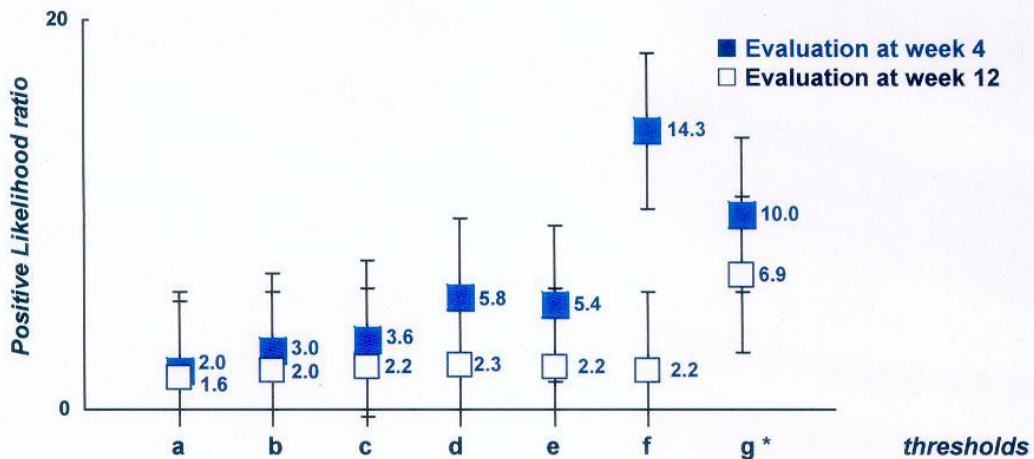

Supplement: MOESM5 [file 9694912]
